# Supplementary material
Source: HighWire-hosted journal article supplement (https://erj.ersjournals.com/content/57/6/2003375)
Supplement: inline-supplementary-material-1 [file inline-supplementary-material-1.pdf]

|                                                          | Ambulatory care<br>(Flutter valve) |      |        |     | Standard care<br>(Chest drain) |      |        |     |         |
|----------------------------------------------------------|------------------------------------|------|--------|-----|--------------------------------|------|--------|-----|---------|
|                                                          | N                                  | Mean | Median | IQR | N                              | Mean | Median | IQR | P value |
| Length of initial hospital stay, (days)                  | 21                                 | 8.9  | 1.0    | 13  | 20                             | 6.6  | 3.5    | 5   | 0.122   |
| Time from pneumothorax until hospital discharge, (days)  | 21                                 | 9.9  | 2.0    | 13  | 20                             | 7.6  | 4.5    | 4.5 | 0.095   |
| Time from randomisation until hospital discharge, (days) | 21                                 | 8.9  | 1.0    | 13  | 20                             | 6.6  | 3.5    | 5   | 0.122   |
| Time to drain removal, (days)                            | 21                                 | 5.7  | 3.0    | 7.5 | 19                             | 3.9  | 2.0    | 5   | 0.357   |
| Time until medically fit, (days)                         | 16                                 | 1.5  | 1.0    | 0   | 15                             | 3.9  | 2.0    | 4   | 0.001   |
| Secondary outcome by pre-specified sub-group analysis    |                                    |      |        |     |                                |      |        |     |         |
